# Supplementary material
Source: PubMed Central journal article supplement (PMC2695811)
Supplement: NIHMS92162-supplement-1.pdf [file NIHMS92162-supplement-1.pdf]

## **Supplementary Information**

### **Autocatalytic aptazymes: ligand-dependent exponential amplification of RNA**

**Bianca J. Lam & Gerald F. Joyce**

Departments of Chemistry and Molecular Biology and The Skaggs Institute for Chemical Biology, The Scripps Research Institute, 10550 North Torrey Pines Road, La Jolla, California 92037, USA

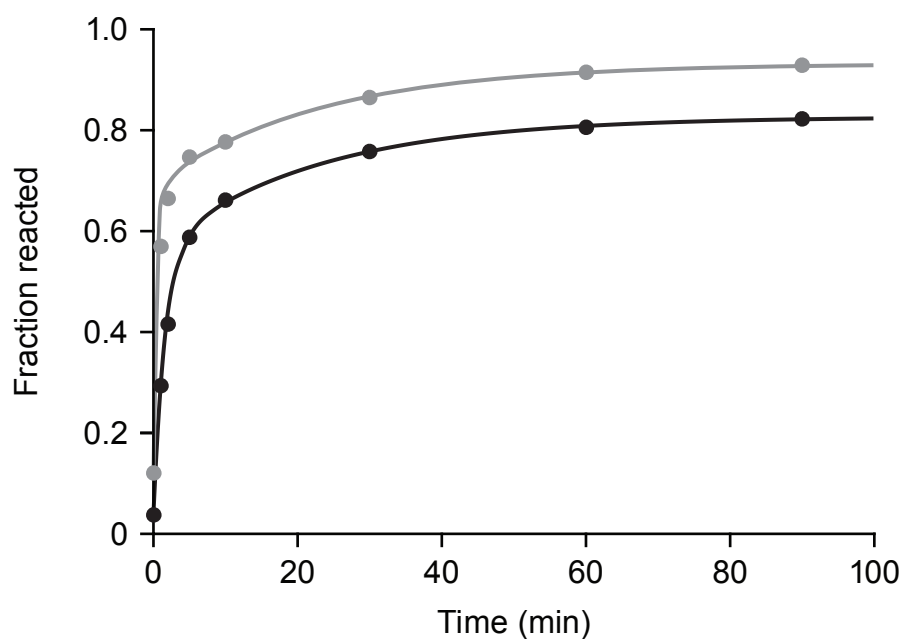

**Figure S1.** Ligand-dependent RNA-catalyzed ligation of RNA. In the presence of 5 mM theophylline, the aptazyme  $E_{\text{theo}}$  catalyzed the ligation of  $A'_{\text{theo}}$  and  $B'$  to form  $E'_{\text{theo}}$  (gray), and the aptazyme  $E'_{\text{theo}}$  catalyzed the ligation of  $A_{\text{theo}}$  and  $B$  to form  $E_{\text{theo}}$  (black). There was no detectable activity in the absence of theophylline or in the presence of 5 mM caffeine. Reaction conditions: 5  $\mu\text{M}$   $E_{\text{theo}}$  or  $E'_{\text{theo}}$ , 0.1  $\mu\text{M}$  [ $5'$ - $^{32}\text{P}$ ]-labeled  $A'_{\text{theo}}$  or  $A_{\text{theo}}$ , 6  $\mu\text{M}$   $B'$  or  $B$ , 25 mM  $\text{MgCl}_2$ , and 50 mM EPPS (pH 8.5) at 42  $^\circ\text{C}$ .

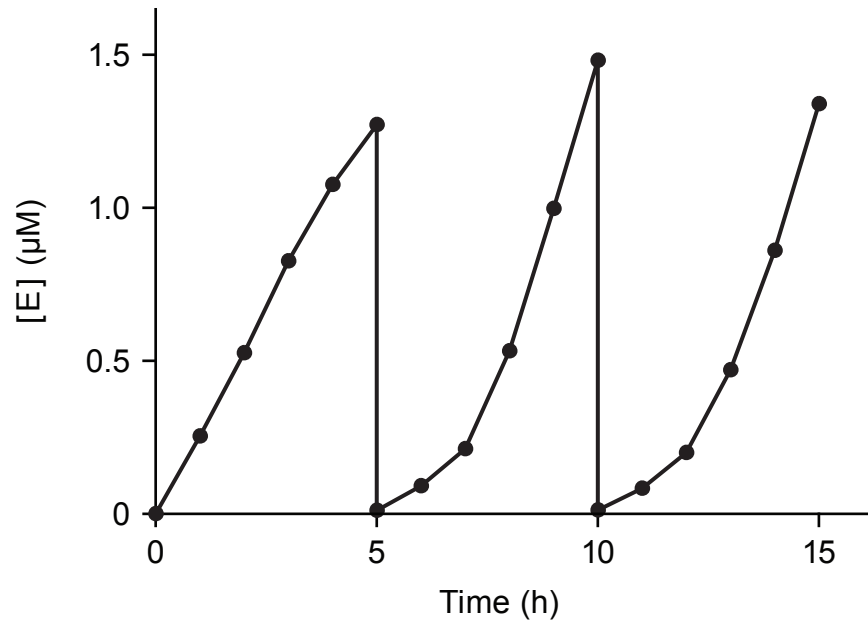

**Figure S2.** Sustained ligand-dependent exponential amplification of RNA. The theophylline-dependent aptazymes underwent three successive rounds of exponential amplification over 5 h, transferring 1% of the material from a completed round to initiate the next round. Reaction conditions:  $0.02 \mu\text{M}$   $E_{\text{theo}}$  and  $E'_{\text{theo}}$  (first round only),  $5 \mu\text{M}$   $A_{\text{theo}}$ ,  $A'_{\text{theo}}$ , B, and B',  $5 \text{ mM}$  theophylline,  $25 \text{ mM}$   $\text{MgCl}_2$ , and  $50 \text{ mM}$  EPPS (pH 8.5) at  $42 \text{ }^\circ\text{C}$ .

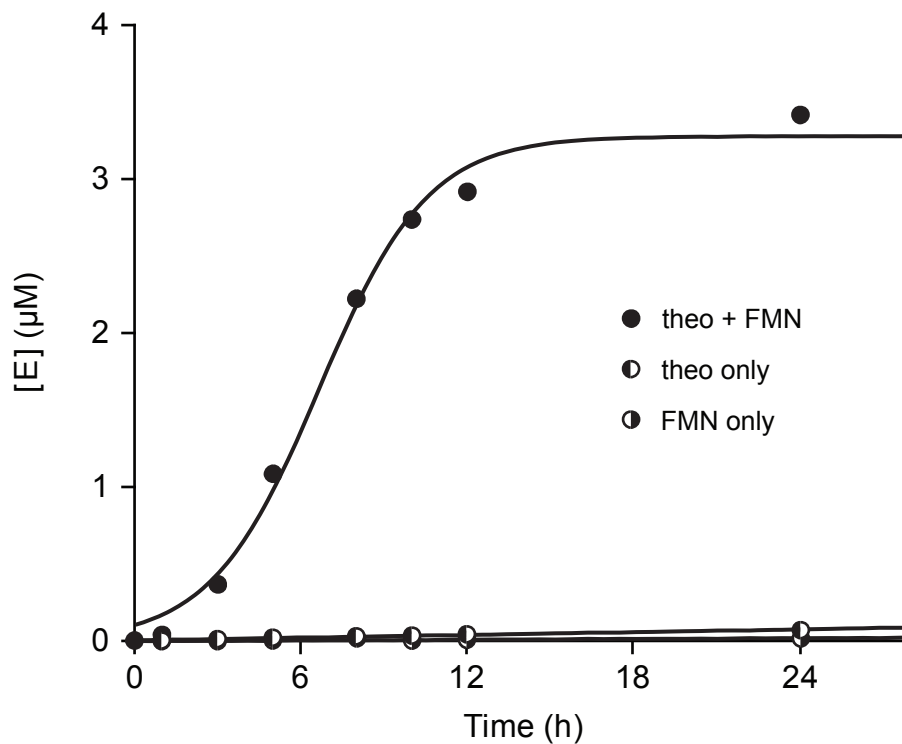

**Figure S3.** Exponential amplification dependent on the presence of two different ligands. The theophylline aptamer was installed in enzyme E and substrate A, and the FMN aptamer was installed in enzyme E' and substrate A'. Exponential growth occurred in the presence of both ligands (filled circles), but only linear amplification occurred in the presence of either theophylline or FMN alone (half-filled circles). Similar results were obtained when the theophylline aptamer was installed in E' and A' and the FMN aptamer was installed in E and A (data not shown). Reaction conditions:  $0.02 \mu\text{M}$   $E_{\text{theo}}$  and  $E'_{\text{FMN}}$ ,  $5 \mu\text{M}$   $A_{\text{theo}}$ ,  $A'_{\text{FMN}}$ , B, and B', 2 mM theophylline and/or 1 mM FMN, 25 mM  $\text{MgCl}_2$ , and 50 mM EPPS (pH 8.5) at 42 °C.

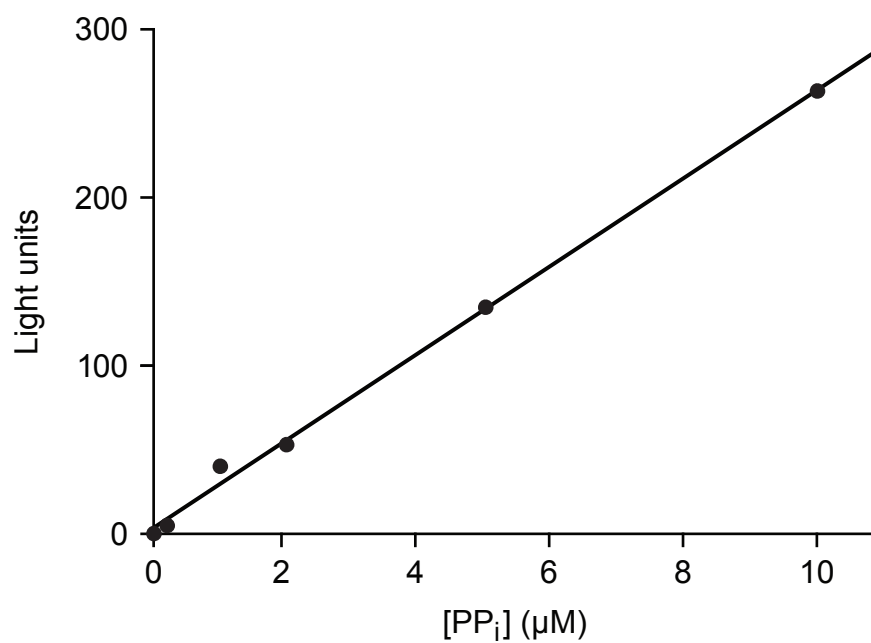

**Figure S4.** Calibration of pyrophosphate-dependent luminescent signal in the ATP-regenerative assay based on analysis of standard concentrations of inorganic pyrophosphate. The best-fit line had a slope of 260 light units per  $\mu\text{M}$  pyrophosphate ( $r = 0.999$ ).

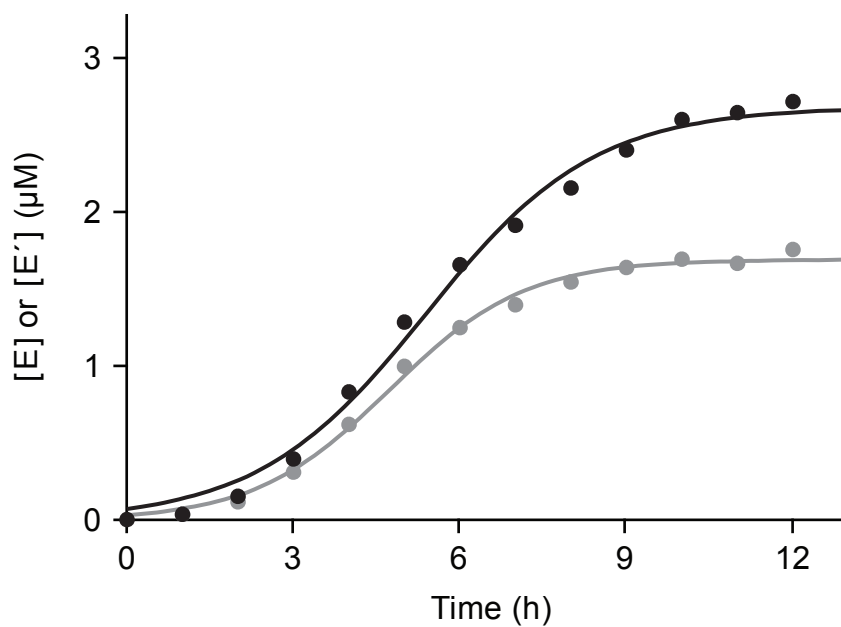

**Figure S5.** Ligand-dependent exponential amplification of RNA in the presence of deproteinized bovine calf serum. The theophylline-dependent aptazymes,  $E_{\text{theo}}$  (black) and  $E'_{\text{theo}}$  (gray), exhibited exponential growth rates of  $0.97$  and  $0.82 \text{ h}^{-1}$ , respectively, similar to their behavior in the absence of calf serum (**Fig. 2a**). Reaction conditions:  $0.02 \mu\text{M } E_{\text{theo}}$  and  $E'_{\text{theo}}$ ,  $5 \mu\text{M } A_{\text{theo}}$ ,  $A'_{\text{theo}}$ , B, and B',  $5 \text{ mM}$  theophylline,  $25 \text{ mM}$   $\text{MgCl}_2$ ,  $50 \text{ mM}$  EPPS (pH 8.5),  $1 \text{ U}/\mu\text{L}$  Superasin, and  $10\%$  phenol-extracted bovine calf serum at  $42 \text{ }^\circ\text{C}$ .
